# Supplementary material for: Tip enhanced Raman spectroscopy (TERS) as a probe for the buckling distortion in silicene
Source: Royal Society of Chemistry journal article supplement (doi:10.1039/c3cp51028j), 2013-01-01
Supplement: c3cp51028j.pdf [file c3cp51028j.pdf]

## Supporting Information File

### *Tip Enhanced Raman Spectroscopy (TERS) as a Probe for the Buckling Distortion in Silicene*

#### Available Information:

1. Cartesian Coordinates for Optimized Structures and their Energies in Hartrees.
2. Harmonic Frequencies.
3. Complete Reference 23
4. Results of calculations done at PBE1PBE/6-311+G(d,p) level of theory.
5. Normal Modes for which Scattering Activity decreases/increases due to coordination to Clusters (at M05-2X/TZVP and PBE1PBE/6-311+G(d,p) levels of theory.)

M05-2X/TZVP

Si<sub>6</sub>H<sub>6</sub>:

| Atomic<br>Number | Coordinates (Angstroms) |           |           |
|------------------|-------------------------|-----------|-----------|
|                  | X                       | Y         | Z         |
| 1                | 0.000000                | 3.659946  | 0.041316  |
| 1                | 3.169606                | 1.829973  | -0.041316 |
| 1                | 3.169606                | -1.829973 | 0.041316  |
| 1                | 0.000000                | -3.659946 | -0.041316 |
| 1                | -3.169606               | -1.829973 | 0.041316  |
| 1                | -3.169606               | 1.829973  | -0.041316 |
| 14               | -1.898055               | -1.095842 | -0.196987 |
| 14               | 0.000000                | -2.191685 | 0.196987  |
| 14               | 1.898055                | -1.095842 | -0.196987 |
| 14               | 1.898055                | 1.095842  | 0.196987  |
| 14               | 0.000000                | 2.191685  | -0.196987 |
| 14               | -1.898055               | 1.095842  | 0.196987  |

M05-2X/TZVP = -1740.4577049 Hartree

Low frequencies (cm<sup>-1</sup>): 99.4119                      99.4167                      128.3781    141.4953                      142.8202                      193.1578  
366.6978                      394.6685                      394.904    396.2289

Si<sub>10</sub>H<sub>8</sub>:

| Atomic<br>Number | Coordinates (Angstroms) |           |           |
|------------------|-------------------------|-----------|-----------|
|                  | X                       | Y         | Z         |
| 1                | -0.067309               | 3.668995  | 1.920033  |
| 1                | 0.020728                | 1.820375  | -5.094686 |
| 1                | -0.067309               | 3.668995  | -1.920033 |
| 1                | 0.067309                | -3.668995 | -1.920033 |
| 1                | -0.020728               | -1.820375 | -5.094686 |
| 1                | 0.067309                | -3.668995 | 1.920033  |
| 1                | -0.020728               | -1.820375 | 5.094686  |
| 1                | 0.020728                | 1.820375  | 5.094686  |
| 14               | -0.227334               | 1.108370  | 0.000000  |
| 14               | 0.227334                | -1.108370 | 0.000000  |
| 14               | -0.194045               | -2.203051 | 1.931127  |
| 14               | 0.194045                | 2.203051  | 1.931127  |
| 14               | -0.194045               | 1.107298  | 3.806647  |
| 14               | 0.194045                | -1.107298 | 3.806647  |
| 14               | 0.194045                | 2.203051  | -1.931127 |
| 14               | -0.194045               | -2.203051 | -1.931127 |
| 14               | -0.194045               | 1.107298  | -3.806647 |
| 14               | 0.194045                | -1.107298 | -3.806647 |

M05-2X/TZVP = -2899.6107718 Hartree

Low frequencies (cm<sup>-1</sup>): 34.7884                      51.8558                      72.0719    86.9749                      97.9990                      103.4098  
111.4081                      119.7183                      122.3147    140.0141

Si<sub>14</sub>H<sub>10</sub>(A):

| Atomic<br>Number | Coordinates (Angstroms) |   |   |
|------------------|-------------------------|---|---|
|                  | X                       | Y | Z |

|    |           |           |           |
|----|-----------|-----------|-----------|
| 14 | -0.194044 | 2.212745  | 3.855489  |
| 14 | -0.220187 | 2.198940  | 0.000000  |
| 14 | -0.194044 | 2.212745  | -3.855489 |
| 14 | 0.194044  | 1.112129  | 5.719929  |
| 14 | 0.222341  | 1.116367  | 1.912176  |
| 14 | 0.222341  | 1.116367  | -1.912176 |
| 14 | -0.194044 | -1.112129 | 5.719929  |
| 14 | -0.222341 | -1.116367 | 1.912176  |
| 14 | -0.222341 | -1.116367 | -1.912176 |
| 14 | 0.194044  | -2.212745 | 3.855489  |
| 14 | 0.220187  | -2.198940 | 0.000000  |
| 1  | -0.073673 | -3.677257 | 3.843129  |
| 1  | -0.075669 | -3.660386 | 0.000000  |
| 14 | 0.194044  | -2.212745 | -3.855489 |
| 1  | -0.073673 | -3.677257 | -3.843129 |
| 14 | -0.194044 | -1.112129 | -5.719929 |
| 1  | 0.004712  | -1.815278 | -7.015682 |
| 14 | 0.194044  | 1.112129  | -5.719929 |
| 1  | -0.004712 | 1.815278  | 7.015682  |
| 1  | 0.004712  | -1.815278 | 7.015682  |
| 1  | -0.004712 | 1.815278  | -7.015682 |
| 1  | 0.073673  | 3.677257  | 3.843129  |
| 1  | 0.075669  | 3.660386  | 0.000000  |
| 1  | 0.073673  | 3.677257  | -3.843129 |

M05-2X/TZVP = -4058.7606744 Hartree

Low frequencies (cm<sup>-1</sup>): 13.0982                      30.2674                      46.7224                      51.1724                      67.1646                      68.9311  
85.1635                      97.8236                      98.9753                      101.8837

Si<sub>14</sub>H<sub>10</sub>(B):

| Atomic | Coordinates (Angstroms) |           |           |
|--------|-------------------------|-----------|-----------|
| Number | X                       | Y         | Z         |
| 1      | 0.037834                | -5.137555 | 2.649862  |
| 1      | -0.012941               | 1.843745  | 4.540436  |
| 1      | 0.017519                | 7.001900  | -0.514330 |
| 1      | -0.037834               | 5.137555  | 2.649862  |
| 1      | -0.046789               | 1.545453  | -3.730878 |
| 1      | -0.112069               | 5.203975  | -3.687861 |
| 1      | 0.012941                | -1.843745 | 4.540436  |
| 1      | -0.017519               | -7.001900 | -0.514330 |
| 1      | 0.112069                | -5.203975 | -3.687861 |
| 1      | 0.046789                | -1.545453 | -3.730878 |
| 14     | -0.193331               | 5.528994  | -0.506298 |
| 14     | 0.214924                | 4.424093  | 1.367971  |
| 14     | -0.203392               | 2.213849  | 1.356343  |
| 14     | 0.214924                | 1.076034  | 3.284968  |
| 14     | -0.214924               | -1.076034 | 3.284968  |
| 14     | 0.203392                | -2.213849 | 1.356343  |
| 14     | -0.239141               | -1.121365 | -0.570210 |
| 14     | 0.239141                | 1.121365  | -0.570210 |
| 14     | -0.262875               | 2.264357  | -2.444232 |
| 14     | 0.142694                | 4.442226  | -2.435487 |
| 14     | 0.262875                | -2.264357 | -2.444232 |
| 14     | -0.142694               | -4.442226 | -2.435487 |
| 14     | 0.193331                | -5.528994 | -0.506298 |
| 14     | -0.214924               | -4.424093 | 1.367971  |

M05-2X/TZVP = -4058.768055 Hartree

Low frequencies ( $\text{cm}^{-1}$ ): 28.7101                    31.5083                    48.6043                    61.1931                    66.5771                    92.0058  
92.1837                    97.5808                    99.6525                    107.9377

$\text{Si}_{18}\text{H}_{12}$ (A):

| Atomic | Coordinates (Angstroms) |           |           |
|--------|-------------------------|-----------|-----------|
| Number | X                       | Y         | Z         |
| 1      | -6.770070               | -2.650606 | 0.079771  |
| 1      | -7.203902               | 0.982743  | -0.023604 |
| 1      | 4.452612                | 5.745416  | -0.065521 |
| 1      | 1.087057                | 7.186428  | 0.007220  |
| 1      | 2.754473                | -6.725043 | -0.106109 |
| 1      | 5.680927                | -4.536610 | 0.068358  |
| 1      | 5.244719                | -0.896152 | 0.061732  |
| 1      | 4.886112                | 2.107975  | 0.029418  |
| 1      | -1.844319               | 4.991407  | -0.040567 |
| 1      | -4.271095               | 3.176955  | 0.013289  |
| 1      | -3.402216               | -4.093372 | 0.002224  |
| 1      | -0.614539               | -5.285441 | -0.059677 |
| 14     | 3.533601                | 2.686159  | -0.199421 |
| 14     | 1.779778                | 1.352987  | 0.233658  |
| 14     | -0.249007               | 2.218534  | -0.218578 |
| 14     | -0.492810               | 4.411951  | 0.190957  |
| 14     | 1.252804                | 5.722592  | -0.199045 |
| 14     | 3.281218                | 4.858421  | 0.164959  |
| 14     | 2.052469                | -0.893546 | -0.190705 |
| 14     | 0.277845                | -2.220992 | 0.204629  |
| 14     | -1.800763               | -1.327615 | -0.219684 |
| 14     | -2.061004               | 0.866028  | 0.212762  |
| 14     | -4.096071               | 1.715318  | -0.209080 |
| 14     | -5.846389               | 0.412937  | 0.187533  |
| 14     | -5.588010               | -1.779127 | -0.155142 |
| 14     | -3.575214               | -2.630788 | 0.219984  |
| 14     | 0.564677                | -4.398858 | -0.258986 |
| 14     | 2.565256                | -5.270076 | 0.138204  |
| 14     | 4.336887                | -3.942203 | -0.160272 |
| 14     | 4.064751                | -1.781984 | 0.260617  |

M05-2X/TZVP = -5217.9273411 Hartree

Low frequencies ( $\text{cm}^{-1}$ ): 3.0233                    16.5951                    26.0587                    36.5386                    41.7134                    42.3524  
68.2427                    70.1244                    90.7684                    94.8885

$\text{Si}_{18}\text{H}_{12}$ (B):

| Atomic | Coordinates (Angstroms) |           |           |
|--------|-------------------------|-----------|-----------|
| Number | X                       | Y         | Z         |
| 1      | -3.674308               | -0.072704 | 1.941712  |
| 1      | -3.674308               | -0.072704 | -1.941712 |
| 1      | -1.785350               | -0.218444 | -8.932836 |
| 1      | -3.665717               | -0.208543 | -5.776262 |
| 1      | 3.689182                | 0.112984  | -5.741684 |
| 1      | 1.839510                | -0.114518 | -8.927353 |
| 1      | 3.648563                | 0.200528  | -1.907308 |

|    |           |           |           |
|----|-----------|-----------|-----------|
| 1  | 3.648563  | 0.200528  | 1.907308  |
| 1  | -1.785350 | -0.218444 | 8.932836  |
| 1  | 1.839510  | -0.114518 | 8.927353  |
| 1  | 3.689182  | 0.112984  | 5.741684  |
| 1  | -3.665717 | -0.208543 | 5.776262  |
| 14 | 1.132378  | 0.118885  | -7.639576 |
| 14 | -1.084863 | -0.334845 | -7.625678 |
| 14 | 2.230780  | -0.184570 | -5.761694 |
| 14 | -2.209209 | 0.098310  | -5.789056 |
| 14 | 1.111213  | 0.270001  | -3.835216 |
| 14 | -1.119981 | -0.213271 | -3.817547 |
| 14 | 2.188977  | -0.102482 | -1.917347 |
| 14 | -2.224421 | 0.274456  | -1.937285 |
| 14 | 1.089165  | 0.328657  | 0.000000  |
| 14 | -1.146325 | -0.138669 | 0.000000  |
| 14 | 2.188977  | -0.102482 | 1.917347  |
| 14 | -2.224421 | 0.274456  | 1.937285  |
| 14 | 1.111213  | 0.270001  | 3.835216  |
| 14 | -1.119981 | -0.213271 | 3.817547  |
| 14 | 2.230780  | -0.184570 | 5.761694  |
| 14 | -2.209209 | 0.098310  | 5.789056  |
| 14 | 1.132378  | 0.118885  | 7.639576  |
| 14 | -1.084863 | -0.334845 | 7.625678  |

M05-2X/TZVP = -5217.9092157 Hartree

Low frequencies (cm<sup>-1</sup>): 8.7912                      22.4977                      31.4099                      33.6787                      49.5205                      50.7371  
67.1805                      70.4935                      80.0715                      86.2443

Si<sub>22</sub>H<sub>14</sub>:

| Atomic<br>Number | Coordinates (Angstroms) |           |            |
|------------------|-------------------------|-----------|------------|
|                  | X                       | Y         | Z          |
| 1                | 3.727579                | -0.061455 | 0.000000   |
| 1                | 3.680647                | 0.072843  | 3.906835   |
| 1                | 1.719025                | 0.492904  | 10.838638  |
| 1                | 3.628891                | 0.370851  | 7.700741   |
| 1                | -3.727550               | -0.022855 | 7.623220   |
| 1                | -1.897974               | 0.339455  | 10.816439  |
| 1                | -3.637632               | -0.260522 | 3.772391   |
| 1                | -3.596433               | -0.360167 | 0.000000   |
| 1                | 3.680647                | 0.072843  | -3.906835  |
| 1                | -3.637632               | -0.260522 | -3.772391  |
| 1                | 3.628891                | 0.370851  | -7.700741  |
| 1                | -3.727550               | -0.022855 | -7.623220  |
| 1                | -1.897974               | 0.339455  | -10.816439 |
| 1                | 1.719025                | 0.492904  | -10.838638 |
| 14               | -1.131713               | -0.254032 | 5.753133   |
| 14               | 1.098898                | 0.244736  | 5.720218   |
| 14               | 2.239163                | -0.306472 | 3.881042   |
| 14               | 1.196187                | 0.025898  | 1.902309   |
| 14               | 2.292652                | -0.468060 | 0.000000   |
| 14               | 1.196187                | 0.025898  | -1.902309  |
| 14               | 2.239163                | -0.306472 | -3.881042  |
| 14               | 1.098898                | 0.244736  | -5.720218  |
| 14               | 2.177419                | 0.043047  | -7.714526  |
| 14               | 1.029409                | 0.533670  | -9.521027  |
| 14               | -1.185837               | 0.057487  | -9.541163  |
| 14               | -2.271733               | 0.287008  | -7.646592  |

|    |           |           |           |
|----|-----------|-----------|-----------|
| 14 | -1.131713 | -0.254032 | -5.753133 |
| 14 | -2.178510 | 0.042442  | -3.809217 |
| 14 | -1.041937 | -0.452546 | -1.923670 |
| 14 | -2.131201 | -0.086110 | 0.000000  |
| 14 | -1.041937 | -0.452546 | 1.923670  |
| 14 | -2.178510 | 0.042442  | 3.809217  |
| 14 | -2.271733 | 0.287008  | 7.646592  |
| 14 | 2.177419  | 0.043047  | 7.714526  |
| 14 | 1.029409  | 0.533670  | 9.521027  |
| 14 | -1.185837 | 0.057487  | 9.541163  |

M05-2X/TZVP = -6377.0571657 Hartree

|                                      |         |         |         |         |         |         |
|--------------------------------------|---------|---------|---------|---------|---------|---------|
| Low frequencies (cm <sup>-1</sup> ): | 10.3810 | 20.6743 | 22.3987 | 23.2645 | 39.4008 | 42.0170 |
|                                      | 45.3463 | 58.2593 | 65.0351 | 69.9632 |         |         |

Si<sub>16</sub>H<sub>10</sub>:

| Atomic | Coordinates (Angstroms) |           |           |
|--------|-------------------------|-----------|-----------|
| Number | X                       | Y         | Z         |
| 14     | 0.203175                | -1.078137 | 3.852083  |
| 14     | 0.234877                | 2.216056  | 1.923529  |
| 14     | 0.156455                | 5.509955  | 0.000000  |
| 14     | -0.203175               | 1.078137  | 3.852083  |
| 14     | -0.234877               | -2.216056 | 1.923529  |
| 14     | -0.203175               | 4.411964  | 1.902681  |
| 14     | -0.237233               | 1.112374  | 0.000000  |
| 14     | -0.203175               | 4.411964  | -1.902681 |
| 14     | 0.203175                | -4.411964 | 1.902681  |
| 14     | 0.237233                | -1.112374 | 0.000000  |
| 14     | 0.234877                | 2.216056  | -1.923529 |
| 14     | -0.156455               | -5.509955 | 0.000000  |
| 14     | -0.234877               | -2.216056 | -1.923529 |
| 14     | -0.203175               | 1.078137  | -3.852083 |
| 14     | 0.203175                | -4.411964 | -1.902681 |
| 14     | 0.203175                | -1.078137 | -3.852083 |
| 1      | -0.036907               | -5.156875 | -3.169229 |
| 1      | -0.039262               | -1.840519 | -5.108240 |
| 1      | 0.036907                | 5.156875  | 3.169229  |
| 1      | 0.039262                | 1.840519  | 5.108240  |
| 1      | -0.039262               | -1.840519 | 5.108240  |
| 1      | -0.036907               | -5.156875 | 3.169229  |
| 1      | 0.068958                | -6.981071 | 0.000000  |
| 1      | 0.039262                | 1.840519  | -5.108240 |
| 1      | 0.036907                | 5.156875  | -3.169229 |
| 1      | -0.068958               | 6.981071  | 0.000000  |

M05-2X/TZVP = -4637.769935 Hartree

|                                      |         |         |          |          |         |         |
|--------------------------------------|---------|---------|----------|----------|---------|---------|
| Low frequencies (cm <sup>-1</sup> ): | 29.3194 | 46.5376 | 51.0379  | 69.3818  | 71.8898 | 79.3672 |
|                                      | 96.8439 | 98.3103 | 102.7157 | 104.3471 |         |         |

Si<sub>22</sub>H<sub>12</sub>:

| Atomic | Coordinates (Angstroms) |          |          |
|--------|-------------------------|----------|----------|
| Number | X                       | Y        | Z        |
| 14     | -4.111327               | 3.715454 | 0.213552 |

|    |           |           |           |
|----|-----------|-----------|-----------|
| 14 | -0.375717 | 2.927888  | 0.257785  |
| 14 | 3.373929  | 2.138300  | 0.269191  |
| 14 | -2.070409 | 4.400735  | -0.182455 |
| 14 | -4.586661 | 1.529408  | -0.257692 |
| 14 | 1.699278  | 3.596711  | -0.170014 |
| 14 | -0.819600 | 0.742458  | -0.239891 |
| 14 | 2.932069  | -0.039380 | -0.196267 |
| 14 | -6.654888 | 0.811671  | 0.164000  |
| 14 | -2.932069 | 0.039380  | 0.196267  |
| 14 | 0.819600  | -0.742458 | 0.239891  |
| 14 | -7.108515 | -1.347523 | -0.207698 |
| 14 | -3.373929 | -2.138300 | -0.269191 |
| 14 | 0.375717  | -2.927888 | -0.257785 |
| 14 | -5.482478 | -2.807932 | 0.158843  |
| 14 | -1.699278 | -3.596711 | 0.170014  |
| 1  | -5.786827 | -4.246237 | -0.074311 |
| 1  | -2.014450 | -5.028827 | -0.096417 |
| 1  | 2.014450  | 5.028827  | 0.096417  |
| 1  | -1.738797 | 5.831066  | 0.064589  |
| 14 | 2.070409  | -4.400735 | 0.182455  |
| 1  | 1.738797  | -5.831066 | -0.064589 |
| 14 | 4.111327  | -3.715454 | -0.213552 |
| 1  | 5.236461  | -4.666361 | 0.004958  |
| 14 | 5.482478  | 2.807932  | -0.158843 |
| 1  | 5.786827  | 4.246237  | 0.074311  |
| 14 | 7.108515  | 1.347523  | 0.207698  |
| 1  | 8.511241  | 1.794719  | -0.007214 |
| 14 | 6.654888  | -0.811671 | -0.164000 |
| 14 | 4.586661  | -1.529408 | 0.257692  |
| 1  | 7.767856  | -1.775967 | 0.054521  |
| 1  | -5.236461 | 4.666361  | -0.004958 |
| 1  | -7.767856 | 1.775967  | -0.054521 |
| 1  | -8.511241 | -1.794719 | 0.007214  |

M05-2X/TZVP = -6375.9245312 Hartree

Low frequencies ( $\text{cm}^{-1}$ ): 13.6254                      31.0127                      40.2797    51.8485                      55.9957                      62.4569  
73.3796                      74.5823                      79.2108    81.8822

$\text{Si}_{28}\text{H}_{14}$ :

| Atomic | Coordinates (Angstroms) |           |           |
|--------|-------------------------|-----------|-----------|
| Number | X                       | Y         | Z         |
| 14     | -5.975407               | 4.116295  | 0.361829  |
| 14     | -2.240676               | 3.323331  | 0.332292  |
| 14     | 1.510510                | 2.533197  | 0.287711  |
| 14     | -3.940839               | 4.809015  | -0.046654 |
| 14     | -6.461388               | 1.939751  | -0.150163 |
| 14     | -0.178123               | 4.002438  | -0.108124 |
| 14     | -2.700238               | 1.143717  | -0.205869 |
| 14     | 1.055360                | 0.353206  | -0.222315 |
| 14     | -8.518650               | 1.220771  | 0.298471  |
| 14     | -4.799478               | 0.440082  | 0.257675  |
| 14     | -1.055360               | -0.353206 | 0.222315  |
| 14     | -8.990900               | -0.936895 | -0.099264 |
| 14     | -5.258232               | -1.734404 | -0.22618  |
| 14     | -1.510510               | -2.533197 | -0.287711 |
| 14     | -7.369632               | -2.404906 | 0.224605  |

|    |            |           |           |
|----|------------|-----------|-----------|
| 14 | -3.594741  | -3.201373 | 0.167834  |
| 1  | -7.676115  | -3.839798 | -0.025531 |
| 1  | -3.912458  | -4.627791 | -0.124629 |
| 1  | 0.141385   | 5.425525  | 0.197663  |
| 1  | -3.601752  | 6.230926  | 0.234715  |
| 14 | 0.178123   | -4.002438 | 0.108124  |
| 1  | -0.141385  | -5.425525 | -0.197663 |
| 14 | 2.240676   | -3.323331 | -0.332292 |
| 14 | 3.594741   | 3.201373  | -0.167834 |
| 1  | 3.912458   | 4.627791  | 0.124629  |
| 14 | 5.258232   | 1.734404  | 0.226183  |
| 14 | 4.799478   | -0.440082 | -0.257675 |
| 14 | 2.700238   | -1.143717 | 0.205869  |
| 1  | -7.105178  | 5.070398  | 0.185871  |
| 1  | -9.635639  | 2.187943  | 0.115754  |
| 1  | -10.393712 | -1.376335 | 0.129726  |
| 14 | 3.940839   | -4.809015 | 0.046654  |
| 1  | 3.601752   | -6.230926 | -0.234715 |
| 14 | 5.975407   | -4.116295 | -0.361829 |
| 1  | 7.105178   | -5.070398 | -0.185871 |
| 14 | 6.461388   | -1.939751 | 0.150163  |
| 14 | 8.518650   | -1.220771 | -0.298471 |
| 14 | 7.369632   | 2.404906  | -0.224605 |
| 14 | 8.990900   | 0.936895  | 0.099264  |
| 1  | 7.676115   | 3.839798  | 0.025531  |
| 1  | 10.393712  | 1.376335  | -0.129726 |
| 1  | 9.635639   | -2.187943 | -0.115754 |

M05-2X/TZVP = -8114.0770256 Hartree

Low frequencies ( $\text{cm}^{-1}$ ): 10.8584                      23.9840                      29.3546    44.2029                      44.2662                      47.5657  
53.4402                      57.3382                      64.3312    68.8955

Si<sub>24</sub>H<sub>12</sub>:

| Atomic | Coordinates (Angstroms) |           |           |
|--------|-------------------------|-----------|-----------|
| Number | X                       | Y         | Z         |
| 1      | -0.739014               | 7.218280  | -0.044875 |
| 1      | -4.173846               | 5.933605  | 0.042744  |
| 1      | 5.880945                | 4.250001  | 0.050054  |
| 1      | 3.051413                | 6.581974  | -0.046517 |
| 1      | -7.226330               | -0.646734 | -0.049769 |
| 1      | -6.619547               | 2.969427  | 0.042541  |
| 1      | 7.226445                | 0.646801  | 0.047213  |
| 1      | 6.619519                | -2.969585 | -0.044384 |
| 1      | 4.173991                | -5.933134 | -0.044525 |
| 1      | 0.739041                | -7.218064 | 0.042320  |
| 1      | -5.880831               | -4.249652 | -0.052325 |
| 1      | -3.051356               | -6.581793 | 0.043723  |
| 14     | -5.855604               | -0.118080 | 0.195049  |
| 14     | -2.086014               | -0.779170 | 0.238914  |
| 14     | -4.154576               | -1.551758 | -0.235018 |
| 14     | -5.495700               | 2.021856  | -0.195723 |
| 14     | -1.717443               | 1.416351  | -0.235229 |
| 14     | -3.420950               | 2.822092  | 0.236635  |
| 14     | 0.368546                | 2.195377  | 0.237809  |
| 14     | 4.154860                | 1.551748  | 0.235163  |
| 14     | 4.500064                | 3.748917  | -0.194417 |



|    |           |           |           |
|----|-----------|-----------|-----------|
| 14 | 2.824803  | 5.129307  | 0.192013  |
| 14 | 0.732514  | 4.373487  | -0.234475 |
| 14 | -0.997403 | 5.771398  | 0.196350  |
| 14 | -3.029683 | 5.010794  | -0.197168 |
| 14 | 1.717307  | -1.416261 | 0.236477  |
| 14 | 2.086019  | 0.779265  | -0.237379 |
| 14 | -0.368679 | -2.195505 | -0.236446 |
| 14 | -4.500055 | -3.749101 | 0.194022  |
| 14 | -2.824615 | -5.128999 | -0.194233 |
| 14 | -0.732621 | -4.373775 | 0.235735  |
| 14 | 0.997311  | -5.770994 | -0.198178 |
| 14 | 3.029621  | -5.011020 | 0.197178  |
| 14 | 3.420792  | -2.821984 | -0.235383 |
| 14 | 5.495989  | -2.021979 | 0.195142  |
| 14 | 5.855485  | 0.117954  | -0.195853 |

M05-2X/TZVP = -6954.9397408 Hartree

Low frequencies (cm<sup>-1</sup>): 21.5640                      25.0996                      28.3627    49.6839                      55.6295                      72.9210  
73.4379                      74.3821                      78.7502    89.4998

Si<sub>30</sub>H<sub>14</sub>:

| Atomic |    | Coordinates (Angstroms) |           |           |           |
|--------|----|-------------------------|-----------|-----------|-----------|
| Number |    | X                       | Y         | Z         |           |
| 1      | 14 | 0                       | -0.176723 | 4.395497  | 3.844711  |
| 2      | 14 | 0                       | -0.229270 | 1.103724  | 1.925756  |
| 3      | 14 | 0                       | -0.264759 | -2.207615 | 0.000000  |
| 4      | 14 | 0                       | 0.255581  | 2.223248  | 3.864797  |
| 5      | 14 | 0                       | 0.258794  | 5.537385  | 1.928552  |
| 6      | 14 | 0                       | 0.229270  | -1.103724 | 1.925756  |
| 7      | 14 | 0                       | 0.264759  | 2.207615  | 0.000000  |
| 8      | 14 | 0                       | 0.229270  | -1.103724 | -1.925756 |
| 9      | 14 | 0                       | -0.184184 | 7.736055  | 1.903499  |
| 10     | 14 | 0                       | -0.203013 | 4.429775  | 0.000000  |
| 11     | 14 | 0                       | -0.229270 | 1.103724  | -1.925756 |
| 12     | 14 | 0                       | 0.174054  | 8.832457  | 0.000000  |
| 13     | 14 | 0                       | 0.258794  | 5.537385  | -1.928552 |
| 14     | 14 | 0                       | 0.255581  | 2.223248  | -3.864797 |
| 15     | 14 | 0                       | -0.184184 | 7.736055  | -1.903499 |
| 16     | 14 | 0                       | -0.176723 | 4.395497  | -3.844711 |
| 17     | 1  | 0                       | 0.054403  | 8.482914  | -3.168965 |
| 18     | 1  | 0                       | 0.085891  | 5.147615  | -5.104428 |
| 19     | 14 | 0                       | -0.195288 | 1.076048  | -5.796175 |
| 20     | 1  | 0                       | 0.039158  | 1.841305  | -7.051883 |
| 21     | 14 | 0                       | 0.195288  | -1.076048 | -5.796175 |
| 22     | 1  | 0                       | -0.039158 | -1.841305 | -7.051883 |
| 23     | 14 | 0                       | 0.203013  | -4.429775 | 0.000000  |
| 24     | 14 | 0                       | -0.258794 | -5.537385 | -1.928552 |
| 25     | 14 | 0                       | 0.176723  | -4.395497 | -3.844711 |
| 26     | 14 | 0                       | -0.255581 | -2.223248 | -3.864797 |
| 27     | 1  | 0                       | -0.085891 | -5.147615 | -5.104428 |
| 28     | 1  | 0                       | 0.085891  | 5.147615  | 5.104428  |
| 29     | 1  | 0                       | 0.054403  | 8.482914  | 3.168965  |
| 30     | 1  | 0                       | -0.047234 | 10.304032 | 0.000000  |
| 31     | 14 | 0                       | -0.195288 | 1.076048  | 5.796175  |
| 32     | 14 | 0                       | 0.184184  | -7.736055 | -1.903499 |
| 33     | 1  | 0                       | -0.054403 | -8.482914 | -3.168965 |
| 34     | 14 | 0                       | -0.174054 | -8.832457 | 0.000000  |

|    |    |   |           |            |          |
|----|----|---|-----------|------------|----------|
| 35 | 14 | 0 | 0.184184  | -7.736055  | 1.903499 |
| 36 | 14 | 0 | -0.258794 | -5.537385  | 1.928552 |
| 37 | 14 | 0 | 0.176723  | -4.395497  | 3.844711 |
| 38 | 14 | 0 | -0.255581 | -2.223248  | 3.864797 |
| 39 | 14 | 0 | 0.195288  | -1.076048  | 5.796175 |
| 40 | 1  | 0 | 0.047234  | -10.304032 | 0.000000 |
| 41 | 1  | 0 | -0.054403 | -8.482914  | 3.168965 |
| 42 | 1  | 0 | -0.085891 | -5.147615  | 5.104428 |
| 43 | 1  | 0 | -0.039158 | -1.841305  | 7.051883 |
| 44 | 1  | 0 | 0.039158  | 1.841305   | 7.051883 |

M05-2X/TZVP = -8693.083514 Hartree

Low frequencies (cm<sup>-1</sup>): 14.8551                      25.9361                      26.3614    32.3294                      40.1312                      58.3722  
61.7233                      64.6167                      67.3160    68.0219

Si<sub>34</sub>H<sub>16</sub>:

| Atomic | Coordinates (Angstroms) |           |           |
|--------|-------------------------|-----------|-----------|
| Number | X                       | Y         | Z         |
| 14     | -7.857162               | 4.504252  | 0.372302  |
| 14     | -4.123086               | 3.712799  | 0.351218  |
| 14     | -0.368893               | 2.929226  | 0.332408  |
| 14     | -5.821356               | 5.204789  | -0.013906 |
| 14     | -8.338853               | 2.333115  | -0.169172 |
| 14     | -2.059555               | 4.403278  | -0.053645 |
| 14     | -4.578646               | 1.538808  | -0.223355 |
| 14     | -0.820095               | 0.751048  | -0.213286 |
| 14     | -10.393313              | 1.607919  | 0.269884  |
| 14     | -6.674351               | 0.831423  | 0.230285  |
| 14     | -2.931136               | 0.040940  | 0.206058  |
| 14     | -10.869468              | -0.549731 | -0.143625 |
| 14     | -7.135382               | -1.342180 | -0.267875 |
| 14     | -3.383004               | -2.138110 | -0.314454 |
| 14     | -9.251105               | -2.018250 | 0.172922  |
| 14     | -5.479186               | -2.809543 | 0.118870  |
| 1      | -9.552356               | -3.452454 | -0.086417 |
| 1      | -5.788856               | -4.234031 | -0.19058  |
| 1      | -1.746946               | 5.817887  | 0.294894  |
| 1      | -5.485557               | 6.620386  | 0.300223  |
| 14     | -1.711066               | -3.610629 | 0.083786  |
| 1      | -2.021356               | -5.028979 | -0.252010 |
| 14     | 0.368893                | -2.929226 | -0.332408 |
| 14     | 1.711066                | 3.610629  | -0.083786 |
| 1      | 2.021356                | 5.028979  | 0.252010  |
| 14     | 3.383004                | 2.138110  | 0.314454  |
| 14     | 2.931136                | -0.040940 | -0.206058 |
| 14     | 0.820095                | -0.751048 | 0.213286  |
| 1      | -8.988384               | 5.458557  | 0.208070  |
| 1      | -11.512134              | 2.574975  | 0.098456  |
| 1      | -12.273558              | -0.986508 | 0.081991  |
| 14     | 2.059555                | -4.403278 | 0.053645  |
| 1      | 1.746946                | -5.817887 | -0.294894 |
| 14     | 4.123086                | -3.712799 | -0.351218 |
| 14     | 4.578646                | -1.538808 | 0.223355  |
| 14     | 6.674351                | -0.831423 | -0.230285 |
| 14     | 5.479186                | 2.809543  | -0.118870 |
| 14     | 7.135382                | 1.342180  | 0.267875  |

|    |           |           |           |
|----|-----------|-----------|-----------|
| 1  | 5.788856  | 4.234031  | 0.190583  |
| 14 | 5.821356  | -5.204789 | 0.013906  |
| 14 | 7.857162  | -4.504252 | -0.372302 |
| 14 | 8.338853  | -2.333115 | 0.169172  |
| 14 | 9.251105  | 2.018250  | -0.172922 |
| 1  | 9.552356  | 3.452454  | 0.086417  |
| 14 | 10.869468 | 0.549731  | 0.143625  |

M05-2X/TZVP = -9852.2284112 Hartree

Low frequencies ( $\text{cm}^{-1}$ ): 5.5334                      18.4470                      20.2671    33.0483                      36.3724                      38.0824  
42.0703                      48.9417                      51.9087    58.2302

$\text{Si}_{38}\text{H}_{16}$ :

| Atomic | Coordinates (Angstroms) |           |           |
|--------|-------------------------|-----------|-----------|
| Number | X                       | Y         | Z         |
| 14     | -4.203177               | 5.971668  | 0.184738  |
| 14     | -0.549554               | 4.839366  | 0.260330  |
| 14     | 3.126173                | 3.709145  | 0.283914  |
| 14     | -2.104923               | 6.463355  | -0.177644 |
| 14     | -4.878244               | 3.829519  | -0.271266 |
| 14     | 1.570117                | 5.317391  | -0.147856 |
| 14     | -1.199505               | 2.695389  | -0.239130 |
| 14     | 2.480027                | 1.566758  | -0.195125 |
| 14     | -6.987199               | 3.315081  | 0.157820  |
| 14     | -3.344731               | 2.194155  | 0.210373  |
| 14     | 0.316840                | 1.065478  | 0.250854  |
| 14     | -7.669316               | 1.186524  | -0.273833 |
| 14     | -3.986150               | 0.062418  | -0.288814 |
| 14     | -0.316840               | -1.065478 | -0.250854 |
| 14     | -6.148575               | -0.441089 | 0.179861  |
| 14     | -2.480027               | -1.566758 | 0.195125  |
| 1      | 2.016927                | 6.714864  | 0.112902  |
| 1      | -1.645112               | 7.859730  | 0.056544  |
| 14     | 1.199505                | -2.695389 | 0.239130  |
| 14     | 3.344731                | -2.194155 | -0.210373 |
| 14     | 5.258926                | 4.180279  | -0.156814 |
| 1      | 5.705642                | 5.578518  | 0.100805  |
| 14     | 6.796600                | 2.574308  | 0.264480  |
| 14     | 6.148575                | 0.441089  | -0.179861 |
| 14     | 3.986150                | -0.062418 | 0.288814  |
| 1      | -5.234618               | 7.020156  | -0.041717 |
| 1      | -8.010481               | 4.370221  | -0.084966 |
| 14     | 4.878244                | -3.829519 | 0.271266  |
| 14     | 6.987199                | -3.315081 | -0.157820 |
| 1      | 8.010481                | -4.370221 | 0.084966  |
| 14     | 7.669316                | -1.186524 | 0.273833  |
| 14     | 9.800145                | -0.668081 | -0.17820  |
| 14     | 8.952746                | 3.043483  | -0.186651 |
| 14     | 10.447198               | 1.438941  | 0.165838  |
| 1      | 9.393079                | 4.447138  | 0.039725  |
| 1      | 11.881485               | 1.765392  | -0.056030 |
| 1      | 10.816747               | -1.731459 | 0.044358  |
| 14     | 4.203177                | -5.971668 | -0.184738 |
| 14     | 2.104923                | -6.463355 | 0.177644  |
| 14     | 0.549554                | -4.839366 | -0.260330 |

|    |            |           |           |
|----|------------|-----------|-----------|
| 14 | -1.570117  | -5.317391 | 0.147856  |
| 14 | -3.126173  | -3.709145 | -0.283914 |
| 14 | -5.258926  | -4.180279 | 0.156814  |
| 14 | -6.796600  | -2.574308 | -0.264480 |
| 14 | -10.447198 | -1.438941 | -0.165838 |
| 14 | -9.800145  | 0.668081  | 0.178201  |
| 14 | -8.952746  | -3.043483 | 0.186651  |
| 1  | 5.234618   | -7.020156 | 0.041717  |
| 1  | 1.645112   | -7.859730 | -0.056544 |
| 1  | -2.016927  | -6.714864 | -0.112902 |
| 1  | -5.705642  | -5.578518 | -0.100805 |
| 1  | -9.393079  | -4.447138 | -0.039725 |
| 1  | -11.881485 | -1.765392 | 0.056030  |
| 1  | -10.816747 | 1.731459  | -0.044358 |

M05-2X/TZVP = -11010.2401471 Hartree

Low frequencies (cm<sup>-1</sup>): 13.5474                      21.0937                      26.5892    30.6355                      34.3365                      45.2027  
48.6786                      51.4115                      53.1512  
66.1835

Si<sub>46</sub>H<sub>18</sub>:

| Atomic | Coordinates (Angstroms) |           |           |
|--------|-------------------------|-----------|-----------|
| Number | X                       | Y         | Z         |
| 14     | -6.729007               | -5.803244 | -0.217296 |
| 14     | -2.974044               | -5.093611 | -0.245602 |
| 14     | 0.803236                | -4.399248 | -0.271637 |
| 14     | -4.707565               | -6.530199 | 0.184077  |
| 14     | -7.163608               | -3.606630 | 0.267671  |
| 14     | -0.929228               | -5.813454 | 0.179238  |
| 14     | -3.383686               | -2.894013 | 0.266355  |
| 14     | 0.399385                | -2.195556 | 0.210460  |
| 14     | -9.191074               | -2.849698 | -0.184924 |
| 14     | -5.450584               | -2.149780 | -0.187044 |
| 14     | -1.687550               | -1.448002 | -0.218837 |
| 14     | -9.638670               | -0.666353 | 0.282173  |
| 14     | -5.856331               | 0.040054  | 0.317650  |
| 14     | -2.080361               | 0.744431  | 0.272415  |
| 14     | -7.943684               | 0.786224  | -0.152457 |
| 14     | -4.176815               | 1.490926  | -0.157585 |
| 1      | -0.649304               | -7.253125 | -0.086401 |
| 1      | -4.403565               | -7.968566 | -0.051428 |
| 14     | -0.399385               | 2.195556  | -0.210460 |
| 14     | 1.687550                | 1.448002  | 0.218837  |
| 14     | 2.861744                | -5.109429 | 0.168545  |
| 1      | 3.142586                | -6.550027 | -0.092094 |
| 14     | 4.576867                | -3.695293 | -0.298020 |
| 14     | 4.176815                | -1.490926 | 0.157585  |
| 14     | 2.080361                | -0.744431 | -0.272415 |
| 1      | -7.875930               | -6.730541 | -0.010530 |
| 1      | -10.331426              | -3.786498 | 0.025623  |
| 14     | 3.383686                | 2.894013  | -0.266355 |
| 14     | 5.450584                | 2.149780  | 0.187044  |
| 14     | 5.856331                | -0.040054 | -0.317650 |
| 14     | 7.943684                | -0.786224 | 0.152457  |

|    |            |           |           |
|----|------------|-----------|-----------|
| 14 | 6.650690   | -4.395472 | 0.153994  |
| 14 | 8.349529   | -2.978768 | -0.289088 |
| 1  | 6.934260   | -5.838220 | -0.090748 |
| 14 | 2.974044   | 5.093611  | 0.245602  |
| 14 | 0.929228   | 5.813454  | -0.179238 |
| 14 | -0.803236  | 4.399248  | 0.271637  |
| 14 | -2.861744  | 5.109429  | -0.168545 |
| 14 | -4.576867  | 3.695293  | 0.298020  |
| 14 | -6.650690  | 4.395472  | -0.153994 |
| 14 | -8.349529  | 2.978768  | 0.289088  |
| 14 | -12.105709 | 2.261936  | 0.171134  |
| 14 | -11.686926 | 0.094887  | -0.186838 |
| 14 | -10.442633 | 3.686119  | -0.168376 |
| 1  | 0.649304   | 7.253125  | 0.086401  |
| 1  | -3.142586  | 6.550027  | 0.092094  |
| 1  | -6.934260  | 5.838220  | 0.090748  |
| 1  | -10.720044 | 5.132411  | 0.047414  |
| 1  | -13.494420 | 2.738158  | -0.068589 |
| 1  | -12.821822 | -0.848795 | 0.007659  |
| 14 | 4.707565   | 6.530199  | -0.184077 |
| 1  | 4.403565   | 7.968566  | 0.051428  |
| 14 | 6.729007   | 5.803244  | 0.217296  |
| 14 | 7.163608   | 3.606630  | -0.267671 |
| 14 | 9.191074   | 2.849698  | 0.184924  |
| 1  | 10.331426  | 3.786498  | -0.025623 |
| 14 | 9.638670   | 0.666353  | -0.282173 |
| 14 | 10.442633  | -3.686119 | 0.168376  |
| 1  | 10.720044  | -5.132411 | -0.047414 |
| 14 | 11.686926  | -0.094887 | 0.186838  |
| 1  | 12.821822  | 0.848795  | -0.007659 |
| 14 | 12.105709  | -2.261936 | -0.171134 |
| 1  | 13.494420  | -2.738158 | 0.068589  |
| 1  | 7.875930   | 6.730541  | 0.010530  |

M05-2X/TZVP = -13327.3952803 Hartree

Low frequencies (cm<sup>-1</sup>): 3.9000                      15.1412                      16.9984                      27.0877                      28.8444                      31.2838  
36.4608                      41.3246                      43.2622                      49.8481

Si<sub>48</sub>H<sub>18</sub>:

| Atomic<br>Number | Coordinates (Angstroms) |           |           |
|------------------|-------------------------|-----------|-----------|
|                  | X                       | Y         | Z         |
| 14               | -0.173322               | 4.391100  | 5.784552  |
| 14               | -0.233605               | 1.095758  | 3.860974  |
| 14               | -0.260676               | -2.215855 | 1.932112  |
| 14               | 0.251705                | 2.223170  | 5.801388  |
| 14               | 0.269248                | 5.546137  | 3.867792  |
| 14               | 0.233605                | -1.095758 | 3.860974  |
| 14               | 0.260676                | 2.215855  | 1.932112  |
| 14               | 0.225210                | -1.110702 | 0.000000  |
| 14               | -0.179248               | 7.724049  | 3.843104  |
| 14               | -0.205578               | 4.425148  | 1.928365  |
| 14               | -0.225210               | 1.110702  | 0.000000  |
| 14               | 0.254874                | 8.860596  | 1.929888  |
| 14               | 0.280304                | 5.530347  | 0.000000  |
| 14               | 0.260676                | 2.215855  | -1.932112 |
| 14               | -0.199136               | 7.747794  | 0.000000  |
| 14               | -0.205578               | 4.425148  | -1.928365 |
| 14               | -0.233605               | 1.095758  | -3.860974 |

|    |           |            |           |
|----|-----------|------------|-----------|
| 14 | 0.233605  | -1.095758  | -3.860974 |
| 14 | 0.205578  | -4.425148  | 1.928365  |
| 14 | -0.280304 | -5.530347  | 0.000000  |
| 14 | 0.205578  | -4.425148  | -1.928365 |
| 14 | -0.260676 | -2.215855  | -1.932112 |
| 1  | 0.083251  | 5.142876   | 7.045636  |
| 1  | 0.079106  | 8.476838   | 5.103318  |
| 14 | -0.251705 | -2.223170  | -5.801388 |
| 14 | 0.173322  | -4.391100  | -5.784552 |
| 1  | -0.083251 | -5.142876  | -7.045636 |
| 14 | -0.269248 | -5.546137  | -3.867792 |
| 14 | 0.179248  | -7.724049  | -3.843104 |
| 14 | 0.199136  | -7.747794  | 0.000000  |
| 14 | -0.254874 | -8.860596  | -1.929888 |
| 1  | -0.079106 | -8.476838  | -5.103318 |
| 14 | 0.193429  | -1.075784  | -7.734899 |
| 14 | -0.193429 | 1.075784   | -7.734899 |
| 14 | 0.251705  | 2.223170   | -5.801388 |
| 14 | -0.173322 | 4.391100   | -5.784552 |
| 14 | 0.269248  | 5.546137   | -3.867792 |
| 14 | -0.179248 | 7.724049   | -3.843104 |
| 14 | 0.254874  | 8.860596   | -1.929888 |
| 14 | 0.150016  | 12.159344  | 0.000000  |
| 14 | -0.201481 | 11.059546  | 1.902415  |
| 1  | -0.201481 | 11.059546  | -1.902415 |
| 1  | -0.037324 | -1.843382  | -8.989704 |
| 1  | 0.037324  | 1.843382   | -8.989704 |
| 1  | 0.083251  | 5.142876   | -7.045636 |
| 1  | 0.079106  | 8.476838   | -5.103318 |
| 1  | 0.028548  | 11.806860  | -3.169161 |
| 1  | -0.080702 | 13.629376  | 0.000000  |
| 1  | 0.028548  | 11.806860  | 3.169161  |
| 14 | -0.193429 | 1.075784   | 7.734899  |
| 14 | -0.251705 | -2.223170  | 5.801388  |
| 14 | -0.269248 | -5.546137  | 3.867792  |
| 14 | -0.254874 | -8.860596  | 1.929888  |
| 14 | 0.201481  | -11.059546 | -1.902415 |
| 14 | -0.150016 | -12.159344 | 0.000000  |
| 14 | 0.193429  | -1.075784  | 7.734899  |
| 14 | 0.173322  | -4.391100  | 5.784552  |
| 14 | 0.179248  | -7.724049  | 3.843104  |
| 14 | 0.201481  | -11.059546 | 1.902415  |
| 1  | 0.037324  | 1.843382   | 8.989704  |
| 1  | -0.037324 | -1.843382  | 8.989704  |
| 1  | -0.083251 | -5.142876  | 7.045636  |
| 1  | -0.079106 | -8.476838  | 5.103318  |
| 1  | -0.028548 | -11.806860 | 3.169161  |
| 1  | 0.080702  | -13.629376 | 0.000000  |
| 1  | -0.028548 | -11.806860 | -3.169161 |

M05-2X/TZVP = -13906.4007131 Hartree

Low frequencies (cm<sup>-1</sup>): 10.7755                      16.0019                      17.7092    20.0068                      26.6434                      34.6886  
40.6651                      43.4322                      44.7646    50.1937

Si<sub>58</sub>H<sub>20</sub>:

Atomic                      Coordinates (Angstroms)

| Number | X         | Y          | Z         |
|--------|-----------|------------|-----------|
| 14     | -0.278896 | 2.728535   | 6.753585  |
| 14     | -0.324457 | -0.566148  | 4.823633  |
| 14     | 0.150304  | 0.561856   | 6.766923  |
| 14     | 0.164071  | 3.889427   | 4.839776  |
| 14     | 0.189824  | 0.561223   | 2.903202  |
| 14     | -0.288441 | 6.063391   | 4.817963  |
| 14     | -0.289420 | 2.762619   | 2.894128  |
| 14     | 0.183936  | 7.210126   | 2.912921  |
| 14     | 0.230211  | 3.875543   | 0.975649  |
| 14     | -0.280151 | 9.393543   | 2.873409  |
| 14     | -0.242280 | 6.088289   | 0.963294  |
| 14     | -0.209435 | 2.767896   | -0.96893  |
| 14     | 0.258245  | 0.552393   | -0.960719 |
| 14     | 0.152917  | -2.754299  | 4.825730  |
| 14     | -0.310807 | -3.879496  | 2.889286  |
| 14     | 0.209435  | -2.767896  | 0.968937  |
| 14     | -0.258245 | -0.552393  | 0.960719  |
| 14     | -0.189824 | -0.561223  | -2.903202 |
| 14     | 0.289420  | -2.762619  | -2.894128 |
| 14     | -0.230211 | -3.875543  | -0.975649 |
| 14     | 0.242280  | -6.088289  | -0.963294 |
| 14     | 0.173465  | -6.082154  | 2.892154  |
| 14     | -0.275223 | -7.193953  | 0.954686  |
| 14     | 0.324457  | 0.566148   | -4.823633 |
| 14     | -0.152917 | 2.754299   | -4.825730 |
| 14     | 0.310807  | 3.879496   | -2.889286 |
| 14     | -0.173465 | 6.082154   | -2.892154 |
| 14     | 0.275223  | 7.193953   | -0.954686 |
| 14     | -0.219422 | 9.407059   | -0.965847 |
| 14     | 0.192701  | 10.522957  | 0.972943  |
| 14     | -0.272636 | 12.725313  | 0.930058  |
| 14     | -0.150304 | -0.561856  | -6.766923 |
| 14     | 0.278896  | -2.728535  | -6.753585 |
| 14     | -0.164071 | -3.889427  | -4.839776 |
| 14     | 0.288441  | -6.063391  | -4.817963 |
| 1      | 0.031054  | -6.811279  | -6.081534 |
| 14     | -0.183936 | -7.210126  | -2.912921 |
| 14     | 0.219422  | -9.407059  | 0.965847  |
| 14     | 0.280151  | -9.393543  | -2.873409 |
| 1      | 0.038594  | -10.145457 | -4.137814 |
| 14     | -0.192701 | -10.522957 | -0.972943 |
| 1      | 0.022621  | -3.477320  | -8.016504 |
| 14     | -0.289134 | -0.587040  | 8.700740  |
| 14     | -0.334668 | -3.883338  | 6.764558  |
| 14     | -0.324742 | -7.204945  | 4.824384  |
| 14     | -0.267762 | -10.522725 | 2.886349  |
| 14     | 0.272636  | -12.725313 | -0.930058 |
| 1      | 0.071787  | -13.474547 | -2.200739 |
| 14     | 0.109571  | 13.823582  | -0.963333 |
| 14     | 0.267762  | 10.522725  | -2.886349 |
| 14     | 0.324742  | 7.204945   | -4.824384 |
| 14     | 0.334668  | 3.883338   | -6.764558 |
| 14     | 0.289134  | 0.587040   | -8.700740 |
| 1      | 0.061171  | -0.181096  | -9.955686 |
| 14     | -0.109571 | -13.823582 | 0.963333  |
| 1      | 0.129342  | -15.292231 | 0.972758  |
| 14     | 0.103287  | -2.737449  | 8.700432  |
| 14     | 0.127527  | -9.381020  | 4.806409  |

|    |           |            |           |
|----|-----------|------------|-----------|
| 14 | 0.201854  | -12.716729 | 2.872488  |
| 14 | -0.201854 | 12.716729  | -2.872488 |
| 14 | -0.127527 | 9.381020   | -4.806409 |
| 14 | -0.094487 | 6.050137   | -6.746466 |
| 14 | -0.103287 | 2.737449   | -8.700432 |
| 14 | 0.094487  | -6.050137  | 6.746466  |
| 1  | 0.043572  | 13.463662  | -4.136457 |
| 1  | 0.133074  | 10.135521  | -6.064932 |
| 1  | 0.157545  | 6.806371   | -8.005661 |
| 1  | 0.124754  | 3.508248   | -9.953707 |
| 1  | -0.124754 | -3.508248  | 9.953707  |
| 1  | -0.157545 | -6.806371  | 8.005661  |
| 1  | -0.133074 | -10.135521 | 6.064932  |
| 1  | -0.043572 | -13.463662 | 4.136457  |
| 1  | -0.061171 | 0.181096   | 9.955686  |
| 1  | -0.022621 | 3.477320   | 8.016504  |
| 1  | -0.031054 | 6.811279   | 6.081534  |
| 1  | -0.038594 | 10.145457  | 4.137814  |
| 1  | -0.071787 | 13.474547  | 2.200739  |
| 1  | -0.129342 | 15.292231  | -0.972758 |

M05-2X/TZVP = -16802.5602758 Hartree

Low frequencies ( $\text{cm}^{-1}$ ):

$\text{Si}_{70}\text{H}_{22}$ :

| Atomic | Coordinates (Angstroms) |           |           |
|--------|-------------------------|-----------|-----------|
| Number | X                       | Y         | Z         |
| 14     | -0.172292               | 4.389529  | 7.718518  |
| 14     | -0.234459               | 1.094447  | 5.792029  |
| 14     | -0.256273               | -2.222484 | 3.863912  |
| 14     | 0.248438                | 2.221483  | 7.733694  |
| 14     | 0.259530                | 5.547375  | 5.800385  |
| 14     | 0.234459                | -1.094447 | 5.792029  |
| 14     | 0.256273                | 2.222484  | 3.863912  |
| 14     | 0.232614                | -1.106221 | 1.933107  |
| 14     | -0.179132               | 7.723401  | 5.781457  |
| 14     | -0.219508               | 4.422776  | 3.860707  |
| 14     | -0.232614               | 1.106221  | 1.933107  |
| 14     | 0.262705                | 8.869837  | 3.868362  |
| 14     | 0.270312                | 5.538657  | 1.933473  |
| 14     | 0.250480                | 2.212783  | 0.000000  |
| 14     | -0.202774               | 7.748525  | 1.928225  |
| 14     | -0.209731               | 4.429339  | 0.000000  |
| 14     | -0.232614               | 1.106221  | -1.933107 |
| 14     | 0.232614                | -1.106221 | -1.933107 |
| 14     | 0.219508                | -4.422776 | 3.860707  |
| 14     | -0.270312               | -5.538657 | 1.933473  |
| 14     | 0.209731                | -4.429339 | 0.000000  |
| 14     | -0.250480               | -2.212783 | 0.000000  |
| 1      | 0.083222                | 5.140733  | 8.979995  |
| 1      | 0.082381                | 8.472598  | 7.043107  |
| 14     | -0.256273               | -2.222484 | -3.863912 |
| 14     | 0.219508                | -4.422776 | -3.860707 |
| 14     | -0.270312               | -5.538657 | -1.933473 |
| 14     | 0.202774                | -7.748525 | -1.928225 |
| 14     | 0.202774                | -7.748525 | 1.928225  |
| 14     | -0.282714               | -8.856318 | 0.000000  |



|    |           |            |            |
|----|-----------|------------|------------|
| 14 | 0.234459  | -1.094447  | -5.792029  |
| 14 | -0.234459 | 1.094447   | -5.792029  |
| 14 | 0.256273  | 2.222484   | -3.863912  |
| 14 | -0.219508 | 4.422776   | -3.860707  |
| 14 | 0.270312  | 5.538657   | -1.933473  |
| 14 | -0.202774 | 7.748525   | -1.928225  |
| 14 | 0.282714  | 8.856318   | 0.000000   |
| 14 | 0.246931  | 12.186085  | 1.930843   |
| 14 | -0.190524 | 11.054138  | 3.840303   |
| 14 | -0.204684 | 11.070611  | 0.000000   |
| 1  | 0.068813  | 11.803807  | 5.102209   |
| 14 | -0.248438 | -2.221483  | -7.733694  |
| 14 | 0.172292  | -4.389529  | -7.718518  |
| 14 | -0.259530 | -5.547375  | -5.800385  |
| 14 | 0.179132  | -7.723401  | -5.781457  |
| 1  | -0.082381 | -8.472598  | -7.043107  |
| 14 | -0.262705 | -8.869837  | -3.868362  |
| 14 | 0.204684  | -11.070611 | 0.000000   |
| 14 | 0.190524  | -11.054138 | -3.840303  |
| 1  | -0.068813 | -11.803807 | -5.102209  |
| 14 | -0.246931 | -12.186085 | -1.930843  |
| 1  | -0.083222 | -5.140733  | -8.979995  |
| 14 | -0.193249 | 1.075699   | 9.668804   |
| 1  | 0.036757  | 1.844696   | 10.922784  |
| 14 | -0.248438 | -2.221483  | 7.733694   |
| 14 | -0.259530 | -5.547375  | 5.800385   |
| 14 | -0.262705 | -8.869837  | 3.868362   |
| 14 | -0.246931 | -12.186085 | 1.930843   |
| 14 | 0.211371  | -14.387562 | -1.901854  |
| 1  | -0.019551 | -15.133449 | -3.169238  |
| 14 | 0.246931  | 12.186085  | -1.930843  |
| 14 | 0.262705  | 8.869837   | -3.868362  |
| 14 | 0.259530  | 5.547375   | -5.800385  |
| 14 | 0.248438  | 2.221483   | -7.733694  |
| 14 | 0.193249  | -1.075699  | -9.668804  |
| 1  | -0.036757 | -1.844696  | -10.922784 |
| 14 | -0.211371 | 14.387562  | 1.901854   |
| 1  | 0.019551  | 15.133449  | 3.169238   |
| 14 | 0.143291  | 15.487147  | 0.000000   |
| 1  | -0.086429 | 16.957278  | 0.000000   |
| 14 | -0.143291 | -15.487147 | 0.000000   |
| 1  | 0.086429  | -16.957278 | 0.000000   |
| 14 | 0.193249  | -1.075699  | 9.668804   |
| 14 | 0.172292  | -4.389529  | 7.718518   |
| 14 | 0.190524  | -11.054138 | 3.840303   |
| 14 | 0.211371  | -14.387562 | 1.901854   |
| 14 | -0.211371 | 14.387562  | -1.901854  |
| 14 | -0.190524 | 11.054138  | -3.840303  |
| 14 | -0.179132 | 7.723401   | -5.781457  |
| 14 | -0.172292 | 4.389529   | -7.718518  |
| 14 | -0.193249 | 1.075699   | -9.668804  |
| 14 | 0.179132  | -7.723401  | 5.781457   |
| 1  | 0.019551  | 15.133449  | -3.169238  |
| 1  | 0.068813  | 11.803807  | -5.102209  |
| 1  | 0.082381  | 8.472598   | -7.043107  |
| 1  | 0.083222  | 5.140733   | -8.979995  |
| 1  | 0.036757  | 1.844696   | -10.922784 |
| 1  | -0.036757 | -1.844696  | 10.922784  |
| 1  | -0.083222 | -5.140733  | 8.979995   |

|   |           |            |          |
|---|-----------|------------|----------|
| 1 | -0.082381 | -8.472598  | 7.043107 |
| 1 | -0.068813 | -11.803807 | 5.102209 |
| 1 | -0.019551 | -15.133449 | 3.169238 |

M05-2X/TZVP = -20277.7242274 Hartree

|                                      |         |         |         |         |         |         |
|--------------------------------------|---------|---------|---------|---------|---------|---------|
| Low frequencies (cm <sup>-1</sup> ): | 7.9186  | 10.8206 | 12.4838 | 13.9767 | 17.1679 | 22.5292 |
| 27.6012                              | 29.8534 | 31.6339 | 35.5556 |         |         |         |

PBE1PBE/6-311+G(d,p)

Si<sub>6</sub>H<sub>6</sub>:

| Atomic Number | Coordinates (Angstroms) |           |           |
|---------------|-------------------------|-----------|-----------|
|               | X                       | Y         | Z         |
| 1             | 0.000000                | 3.669212  | 0.042970  |
| 1             | 3.177631                | 1.834606  | -0.042970 |
| 1             | 3.177631                | -1.834606 | 0.042970  |
| 1             | 0.000000                | -3.669212 | -0.042970 |
| 1             | -3.177631               | -1.834606 | 0.042970  |
| 1             | -3.177631               | 1.834606  | -0.042970 |
| 14            | -1.902083               | -1.098168 | -0.177914 |
| 14            | 0.000000                | -2.196336 | 0.177914  |
| 14            | 1.902083                | -1.098168 | -0.177914 |
| 14            | 1.902083                | 1.098168  | 0.177914  |
| 14            | 0.000000                | 2.196336  | -0.177914 |
| 14            | -1.902083               | 1.098168  | 0.177914  |

PBE1PBE/6-311+G(d,p) = -1739.7900893 Hartree

|                                      |          |          |          |          |          |          |
|--------------------------------------|----------|----------|----------|----------|----------|----------|
| Low frequencies (cm <sup>-1</sup> ): | 100.9010 | 100.9011 | 124.0246 | 146.1210 | 146.1222 | 209.9951 |
| 368.1760                             | 387.3672 | 387.3726 | 387.7599 |          |          |          |

Si<sub>10</sub>H<sub>14</sub>(A):

| Atomic Number | Coordinates (Angstroms) |           |           |
|---------------|-------------------------|-----------|-----------|
|               | X                       | Y         | Z         |
| 14            | 0.251142                | 2.205317  | 3.864151  |
| 14            | 0.215942                | 2.200431  | 0.000000  |
| 14            | 0.251142                | 2.205317  | -3.864151 |
| 14            | 0.398068                | 1.052031  | 5.736021  |
| 14            | 0.398068                | 1.064316  | 1.919357  |
| 14            | 0.398068                | 1.064316  | -1.919357 |
| 14            | -0.398068               | -1.052031 | 5.736021  |
| 14            | -0.398068               | -1.064316 | 1.919357  |
| 14            | -0.398068               | -1.064316 | -1.919357 |
| 14            | -0.251142               | -2.205317 | 3.864151  |
| 14            | -0.215942               | -2.200431 | 0.000000  |
| 1             | -0.793078               | -3.593055 | 3.857294  |
| 1             | -0.777192               | -3.582145 | 0.000000  |
| 14            | -0.251142               | -2.205317 | -3.864151 |
| 1             | -0.793078               | -3.593055 | -3.857294 |
| 14            | -0.398068               | -1.052031 | -5.736021 |
| 1             | -0.356450               | -1.788296 | -7.030095 |
| 14            | 0.398068                | 1.052031  | -5.736021 |
| 1             | 0.356450                | 1.788296  | 7.030095  |
| 1             | -0.356450               | -1.788296 | 7.030095  |
| 1             | 0.356450                | 1.788296  | -7.030095 |
| 1             | 0.793078                | 3.593055  | 3.857294  |
| 1             | 0.777192                | 3.582145  | 0.000000  |

1 0.793078 3.593055 -3.857294

PBE1PBE/6-311+G(d,p) = -4057.1951243 Hartree

Low frequencies (cm<sup>-1</sup>): 20.9883 35.1994 53.5056 59.7313 73.5560 77.7626  
90.8391 99.8520 106.6263 107.2382.

Si<sub>18</sub>H<sub>12</sub> (A):

| Atomic<br>Number | Coordinates (Angstroms) |           |           |
|------------------|-------------------------|-----------|-----------|
|                  | X                       | Y         | Z         |
| 6                | 3.690464                | 0.672552  | 0.000096  |
| 6                | 2.497484                | 1.361453  | 0.000093  |
| 6                | 1.256151                | 0.698041  | 0.000004  |
| 6                | 1.246272                | -0.715003 | -0.000042 |
| 6                | 2.478069                | -1.395587 | -0.000041 |
| 6                | 3.680600                | -0.723411 | 0.000018  |
| 6                | -0.003695               | 1.436792  | -0.000020 |
| 6                | -0.023479               | -1.436526 | -0.000048 |
| 6                | -1.242277               | -0.721626 | 0.000042  |
| 6                | -1.232334               | 0.738657  | 0.000038  |
| 6                | -2.447738               | -1.447966 | 0.000108  |
| 6                | -2.466879               | -2.825469 | 0.000061  |
| 6                | -1.262768               | -3.531776 | -0.000063 |
| 6                | -0.069514               | -2.843109 | -0.000112 |
| 1                | 4.629820                | 1.215430  | 0.000171  |
| 1                | 4.612294                | -1.279345 | 0.000018  |
| 1                | -3.414109               | -3.354481 | 0.000114  |
| 1                | -1.262163               | -4.616743 | -0.000116 |
| 6                | -0.030532               | 2.843882  | -0.000105 |
| 6                | -1.214127               | 3.548823  | -0.000095 |
| 6                | -2.427869               | 2.859020  | 0.000001  |
| 6                | -2.427701               | 1.481394  | 0.000058  |
| 1                | -1.198964               | 4.633681  | -0.000168 |
| 1                | -3.367843               | 3.400860  | 0.000016  |
| 1                | -3.381607               | 0.969864  | 0.000109  |
| 1                | -3.394652               | -0.923541 | 0.000198  |
| 1                | 0.850144                | -3.414086 | -0.000203 |
| 1                | 2.497534                | -2.477867 | -0.000075 |
| 1                | 2.531936                | 2.443362  | 0.000182  |
| 1                | 0.896866                | 3.402018  | -0.000201 |

PBE1PBE/6-311+G(d,p) = -692.5131535 Hartree

Low frequencies (cm<sup>-1</sup>): 52.7854 52.9619 105.2069 120.6883 261.0411 261.2936 272.1419  
272.1950 410.6721 410.7266.

Complete Reference 23:

Gaussian 03, Revision C.01,

M. J. Frisch, G. W. Trucks, H. B. Schlegel, G. E. Scuseria, M. A. Robb, J. R. Cheeseman, J. A. Montgomery, Jr., T. Vreven,

K. N. Kudin, J. C. Burant, J. M. Millam, S. S. Iyengar, J. Tomasi, V. Barone, B. Mennucci, M. Cossi, G. Scalmani, N. Rega, G. A. Petersson, H. Nakatsuji, M. Hada, M. Ehara, K. Toyota, R. Fukuda, J. Hasegawa, M. Ishida, T. Nakajima, Y. Honda, O. Kitao, H. Nakai, M. Klene, X. Li, J. E. Knox, H. P. Hratchian, J. B. Cross, C. Adamo, J. Jaramillo, R. Gomperts, R. E. Stratmann, O. Yazyev, A. J. Austin, R. Cammi, C. Pomelli, J. W. Ochterski, P. Y. Ayala, K. Morokuma, G. A. Voth, P. Salvador, J. J. Dannenberg, V. G. Zakrzewski, S. Dapprich, A. D. Daniels, M. C. Strain, O. Farkas, D. K. Malick, A. D. Rabuck, K. Raghavachari, J. B. Foresman, J. V. Ortiz, Q. Cui, A. G. Baboul, S. Clifford, J. Cioslowski, B. B. Stefanov, G. Liu, A. Liashenko, P. Piskorz, I. Komaromi, R. L. Martin, D. J. Fox, T. Keith, M. A. Al-Laham, C. Y. Peng, A. Nanayakkara, M. Challacombe, P. M. W. Gill, B. Johnson, W. Chen, M. W. Wong, C. Gonzalez, and J. A. Pople,

Gaussian, Inc., Wallingford CT, 2004.

**Table 1.** The buckling frequency, scattering activity, enhancement in scattering activity and binding energy for silicene fragments in the presence of metal clusters at *PBE1PBE/6-311+G(d,p)* level of theory.

| Species                                             | Buckling Frequency (cm <sup>-1</sup> ) | Scattering Acitivity (S. A) (A <sup>4</sup> /AMU) | Enhancement in S.A | Binding Energy (kcal/mol) | Induced Polarizability (a.u) | HOMO-LUMO gap (eV) |
|-----------------------------------------------------|----------------------------------------|---------------------------------------------------|--------------------|---------------------------|------------------------------|--------------------|
| Si <sub>6</sub> H <sub>6</sub>                      | 124                                    | 4.01                                              |                    |                           |                              | 3.52               |
| Si <sub>6</sub> H <sub>6</sub> ...Au <sub>2</sub>   | 83                                     | 23.22                                             | 5.79               | -23.77                    | 13.73                        | 3.23               |
| Si <sub>6</sub> H <sub>6</sub> ...Au <sub>4</sub>   | 72                                     | 49.66                                             | 12.38              | -20.12                    | 47.41                        | 1.98               |
| Si <sub>6</sub> H <sub>6</sub> ...Au <sub>20</sub>  | 83                                     | 118.21                                            | 29.48              | -23.82                    | 87.03                        | 2.66               |
| Si <sub>6</sub> H <sub>6</sub> ...Ag <sub>2</sub>   | 91                                     | 65.56                                             | 16.35              | -13.98                    | 16.18                        | 1.82               |
| Si <sub>6</sub> H <sub>6</sub> ...Ag <sub>4</sub>   | 68                                     | 160.1                                             | 39.93              | -10.71                    | 46.92                        | 1.28               |
| Si <sub>6</sub> H <sub>6</sub> ...Ag <sub>20</sub>  | 94                                     | 167.93                                            | 41.88              | -14.40                    | 80.59                        | 1.76               |
| Si <sub>14</sub> H <sub>10</sub>                    | 145                                    | 46.67                                             |                    |                           |                              | 1.87               |
| Si <sub>14</sub> H <sub>10</sub> ...Au <sub>2</sub> | 130                                    | 82.07                                             | 1.76               | -22.49                    | 14.51                        | 1.76               |
| Si <sub>14</sub> H <sub>10</sub> ...Ag <sub>2</sub> | 134                                    | 96.28                                             | 2.06               | -14.86                    | 28.1                         | 1.41               |
| Si <sub>18</sub> H <sub>12</sub>                    | 145                                    | 27.56                                             |                    |                           |                              | 2.53               |
| Si <sub>18</sub> H <sub>12</sub> ...Au <sub>2</sub> | 132                                    | 62.59                                             | 2.27               | -20.55                    | 24.05                        | 2.31               |
| Si <sub>18</sub> H <sub>12</sub> ...Ag <sub>2</sub> | 134                                    | 68.58                                             | 2.49               | -12.2                     | 34.68                        | 1.72               |

**Normal Modes for which Scattering Activity decreased (*PBE1PBE/6-311+G(d,p)* level of theory.)**

| HSB                    |           |         | HSB...Au <sub>2</sub> |           | HSB...Au <sub>4</sub> |         | HSB...Au <sub>20</sub> |        |
|------------------------|-----------|---------|-----------------------|-----------|-----------------------|---------|------------------------|--------|
| Normal Mode            | Frequency | S.A     | Frequency             | S.A       | Frequency             | S.A     | Frequency              | S.A    |
| Ring Expansion         | 368       | 167.49  | 375                   | 146.52    | 372                   | 108.61  | 375                    | 122.16 |
| Si-H Wagging           | 547       | 3.98    | 554                   | 0.00      | 557                   | 0.70    | 559                    | 0.02   |
| Si-H Wagging           | 712       | 46.74   | 710                   | 35.56     | 709                   | 36.42   | 711                    | 25.34  |
| Si-H Wagging           | 712       | 46.76   | 710                   | 35.28     | 710                   | 38.92   | 712                    | 24.64  |
| Si-H Asymm. stretching | 2224      | 444.99  | 2224                  | 435.81    | 2223                  | 433.82  | 2223                   | 332.14 |
| Si-H Asymm. stretching | 2224      | 444.66  | 2224                  | 435.90    | 2224                  | 426.34  | 2226                   | 345.41 |
| Si-H symm. stretching  | 2235      | 1127.34 | 2234                  | 1161.1206 | 2233                  | 1164.05 | 2233                   | 854.58 |

**Normal Modes for which Scattering Activity increased (*PBE1PBE/6-311+G(d,p)* level of theory.)**

| HSB                      |           |      | HSB...Au <sub>2</sub> |       | HSB...Au <sub>4</sub> |        | HSB...Au <sub>20</sub> |        |
|--------------------------|-----------|------|-----------------------|-------|-----------------------|--------|------------------------|--------|
| Normal Mode              | Frequency | S.A  | Frequency             | S.A   | Frequency             | S.A    | Frequency              | S.A    |
| Si-Si bending (buckling) | 101       | 0    | 43                    | 9.27  | 40                    | 3.8183 | 32                     | 3.36   |
| Si-Si bending            | 101       | 0    | 44                    | 9.47  |                       |        | 35                     | 10.98  |
| buckling                 | 124       | 4.01 | 83                    | 23.22 | 72                    | 49.66  | 83                     | 118.20 |
| Si-H bending             | 210       | 0    | 217                   | 2.44  | 210                   | 2.73   | 221                    | 34.09  |
| Si-H bending             | 387       | 7.45 | 376                   | 9.87  | 376                   | 20.63  | 388                    | 18.51  |
| Si-H bending             | 387       | 7.42 | 376                   | 8.08  | 386                   | 10.09  | 392                    | 16.56  |
| Si-H bending             | 388       | 0    | 399                   | 3.54  | 393                   | 15.36  | 406                    | 15.25  |
| Si-H bending             | 388       | 0    | 400                   | 3.37  | 396                   | 29.06  | 408                    | 7.78   |
| Si-H bending             | 396       | 0    | 410                   | 3.10  | 406                   | 2.99   | 412                    | 5.46   |
| Si-H bending             | 458       | 0    | 458                   | 2.03  | 457                   | 2.67   | 459                    | 6.71   |
| Si-H bending             | 458       | 0    | 459                   | 2.00  | 458                   | 4.44   | 460                    | 6.85   |
| Si-Si stretching         | 544       | 0    | 550                   | 3.99  | 548                   | 6.60   | 550                    | 3.43   |
| Si-H bending             | 730       | 0    | 728                   | 2.56  | 729                   | 4.77   | 730                    | 7.75   |
| Si-H bending             | 730       | 0    | 728                   | 2.56  | 730                   | 3.15   | 731                    | 7.67   |
| Si-H Asymm. stretching   | 2221      | 0    | 2221                  | 25.67 | 2220                  | 110.54 | 2220                   | 171.66 |
| Si-H Asymm. stretching   | 2230      | 0    | 2230                  | 36.92 | 2229                  | 118.05 | 2229                   | 230.32 |
| Si-H symm. stretching    | 2230      | 0    | 2230                  | 36.41 | 2230                  | 116.23 | 2231                   | 262.73 |

**Normal Modes for which Scattering Activity decreased (*M05-2X/TZVP* level of theory.)**

| HSB                    |           |         | HSB...Au <sub>2</sub> |         | HSB...Au <sub>4</sub> |         | HSB...Au <sub>20</sub> |        |
|------------------------|-----------|---------|-----------------------|---------|-----------------------|---------|------------------------|--------|
| Normal Mode            | Frequency | S.A     | Frequency             | S.A     | Frequency             | S.A     | Frequency              | S.A    |
| Ring Expansion         | 369       | 167.65  | 372                   | 139.61  | 374                   | 141.68  | 373                    | 132.20 |
| Si-H Wagging           | 549       | 8.92    | 540                   | 5.21    | 546                   | 3.12    | 542                    | 3.37   |
| Si-H Wagging           | 550       | 8.92    | 545                   | 5.40    | 547                   | 6.19    | 546                    | 3.65   |
| Si-H Wagging           | 721       | 48.65   | 694                   | 38.28   | 704                   | 39.65   | 704                    | 26.83  |
| Si-H Wagging           | 721       | 53.14   | 701                   | 39.44   | 719                   | 39.25   | 716                    | 27.48  |
| Si-H Asymm. stretching | 2197      | 519.72  | 2209                  | 491.94  | 2199                  | 430.04  | 2210                   | 328.66 |
| Si-H Asymm. stretching | 2197      | 519.87  | 2213                  | 616.52  | 2205                  | 507.32  | 2220                   | 390.36 |
| Si-H symm. stretching  | 2207      | 1393.76 | 2224                  | 1106.51 |                       | 1166.86 | 2227                   | 837.15 |

**Normal Modes for which Scattering Activity increased (M05-2X/TZVP level of theory.)**

| HSB                      |           |         | HSB...Au <sub>2</sub> |         | HSB...Au <sub>4</sub> |         | HSB...Au <sub>20</sub> |        |
|--------------------------|-----------|---------|-----------------------|---------|-----------------------|---------|------------------------|--------|
| Normal Mode              | Frequency | S.A     | Frequency             | S.A     | Frequency             | S.A     | Frequency              | S.A    |
| Si-Si bending (buckling) | 99        | 0       | 56                    | 5.97    | 32                    | 0.68    | 43                     | 4.59   |
| Si-Si bending            | 99        | 0       | 72                    | 4.06    | 54                    | 11.28   | 47                     | 0.62   |
| buckling                 | 125       | 23.46   | 104                   | 25.87   | 96                    | 52.11   | 100                    | 95.25  |
| Si-H bending             | 196       | 0       | 208                   | 3.46    | 206                   | 7.26    | 222                    | 32.52  |
| Si-H bending             | 395       | 4.40    | 378                   | 12.40   | 388                   | 7.11    | 402                    | 10.16  |
| Si-H bending             | 395       | 4.10    | 392                   | 2.19    | 398                   | 13.00   | 416                    | 9.78   |
| Si-H bending             | 395       | 0       | 396                   | 3.86    | 401                   | 1.82    | 420                    | 3.00   |
| Si-H bending             | 395       | 0       | 406                   | 1.80    | 409                   | 12.27   | 428                    | 7.49   |
| Si-H bending             | 401       | 0       | 411                   | 0.56    | 417                   | 3.70    | 436                    | 6.09   |
| Si-H bending             | 461       | 0       | 454                   | 3.02    | 457                   | 3.95    | 462                    | 5.97   |
| Si-H bending             | 461       | 0       | 459                   | 3.18    | 464                   | 6.98    | 472                    | 5.81   |
| Si-Si stretching         | 530       | 0       | 534                   | 0.01    | 542                   | 0.50    | 538                    | 0.34   |
| Si-H bending             | 593       | 0       | 563                   | 0.00    | 584                   | 0.19    | 584                    | 0.03   |
| Si-H bending             | 623       | 0.01    | 600                   | 0.24    | 617                   | 0.52    | 619                    | 0.23   |
| Si-H Asymm. stretching   | 2202      | 0       | 2215                  | 41.52   | 2207                  | 123.75  | 2221                   | 219.07 |
| Si-H Asymm. stretching   | 2202      | 0       | 2221                  | 124.99  | 2211                  | 178.49  | 2225                   | 203.75 |
| Si-H symm. stretching    | 2207      | 1393.76 | 2224                  | 1106.51 | 2213                  | 1166.86 | 2227                   | 837.15 |
